# Supplementary material for: Validation study of German inpatient administrative health data for epidemiological surveillance and measurement of quality of care for sepsis: the OPTIMISE study protocol
Source: PubMed Central journal article supplement — BMJ Open. 2020 Oct 5;10(10):e035763. doi: 10.1136/bmjopen-2019-035763 (PMC7537443; doi:10.1136/bmjopen-2019-035763), 2020-10-05
Supplement: bmjopen-2019-035763supp004.pdf [file bmjopen-2019-035763supp004.pdf]

## Supplementary Material 4

## Codes of the International Classification of Diseases and related Health Problems (ICD-10 GM) used in coding abstraction strategies for identification of sepsis status according to sepsis-1 in administrative health data

### Explicit sepsis codes

A021; A200; A207; A217; A227; A241; A267; A282; A327; A391; A392; A393; A394; A40; A41; A427; A483; A499; A548; B007; B376; B377; B49; O753; O85; P36; R650; R651; R572

### Organ dysfunction codes

E872; D65; D688; D689; D695; D696; F05; G931; G934; I959; J960; J969; J80; J984; K720; K762; K727; K763; N17; N19; R40; R572; R578; R579; R060; R068; R651

### Infection codes

A00; A01; A02; A03; A04; A05; A06; A07; A08; A09; A15; A16; A17; A18; A19; A20; A21; A22; A23; A24; A25; A26; A27; A28; A32; A36; A37; A38; A39; A40; A41; A42; A43; A44; A46; A48; A49; A54; A690; A691; A692; A698; A699; A90; A91; B00; B012; B35; B36; B37; B38; B39; B40; B41; B42; B43; B44; B45; B46; B47; B48; B49; B50; B51; B52; B53; B54; G00; G01; G02; G03; G04; G05; G06; G07; G08; I30; I32; I33; I39; I40; I41; I80; J00; J01; J02; J03; J04; J05; J06; J09; J10; J11; J12; J13; J14; J15; J16; J17; J18; J20; J21; J22; J440; J441; J47; J69; J85; J86; K35; K36; K37; K5702; K5703; K5712; K5713; K5722; K5723; K5732; K5733; K5742; K5743; K5752; K5753; K5782; K5783; K5792; K5793; K61; K630; K631; K65; K67; K750; K751; K810; L03; L04; L05; L08; L88; M00; M01; M86; N10; N11; N12; N151; N159; N16; N288; N30; N34; N390; N41; N45; N482; N49; N51; N61; N70; N71; N72; N73; N74; N75; N76; N77; O03; O04; O05; O06; O07; O080; O753; O85; P36; R572; R650; R651; T802; T814; T826; T827; T835; T836; T845; T846; T847; T857; T880; U6900

The presented codes will be checked and if necessary corrected before final analysis of the study data.
